# Supplementary material for: Characterization and antimicrobial activity of essential oils extracted from lemongrass (Cymbopogon flexuosus) using microwave-assisted hydro distillation
Source: publisher site journal article supplement (doi:10.1515/znc-2024-0095), 2024-09-24
Supplement: Supplementary file 1 [file j_znc-2024-0095_suppl_001.docx]

**Characterization and antimicrobial activity of essential oils extracted from lemongrass (*Cymbopogon flexuosus*) using microwave-assisted hydro distillation**

Krishnendu Adhikary1, Saurav Barman2*, Pradipta Banerjee3, Pallav Mondal4, Bomba Dam5, Arijit Misra5, Narayan Chandra Mandal6, Debosmita Mukherjee6, Bidyut Bandyopadhyay7, Rajkumar Maiti8*

1Department of Interdisciplinary Science, Centurion University of Technology and Management, Odisha 761211, India

2Department of Soil Science, Centurion University of Technology and Management, Odisha 761211, India

3Department of Surgery, McGowan Institute for Regenerative Medicine, University of Pittsburgh School of Medicine, Pittsburgh, PA 15219, USA; and Department of Biochemistry and Plant Physiology, Centurion University of Technology and Management, Odisha761211, India

4Department of Chemistry, National Institute of Technology, Durgapur 713209, West Bengal, India

5Microbiology Laboratory, Department of Botany, Institute of Science, Visva-Bharati (A Central University), Santiniketan, West Bengal 731235, India

6Mycology and Plant Pathology Laboratory, Department of Botany, Institute of Science, Visva-Bharati (A Central University), Santiniketan 731235, India

7Department of Biotechnology, Oriental Institute of Science and Technology, Dewandighi, Burdwan, West Bengal 713102, India

8Department of Physiology, Bankura Christian College, Bankura 722101, West Bengal, India

| **Table S1:** Advantages and disadvantages of different methods used for extraction of citral from different *Cymbopogon spp.* | | | | | | |
| --- | --- | --- | --- | --- | --- | --- |
| **Technique** | **Description** | **Yield of citral (%)** | **Additional compounds** | **Advantages** | **Disadvantages** | **References** |
| Hydro distillation | Steam passes through plant material, volatilizing essential oils, then condensed and collected. | 2.16 - 35.97 | Monoterpenes, alcohols, esters | Simple, widely available, affordable | Low yield, long extraction time, thermal degradation risk | [1,2] |
| Microwave-assisted hydro distillation | Microwave heating combined with HD for faster extraction. | 86.48 | Similar as HD | Faster extraction, higher yield, reduced thermal degradation, improved energy efficiency, potentially higher quality oil due to shorter heating time | Requires specialized equipment, potential safety concerns | [3,4] |
| Ultrasound-assisted extraction | Ultrasound waves disrupt plant cell walls, enhancing oil release. | 0.5 –90.45 | Similar as HD, potentially increased antioxidant activity | Higher yield, shorter extraction time, reduced solvent use | Expensive equipment, limited scalability, potential for compound degradation due to sonication | [3,5] |
| Supercritical fluid extraction | CO2 used as a solvent under high pressure & temperature, separating oil components. | 35.13- 47.09 | Selective extraction, high purity | High purity product, environmentally friendly | Expensive equipment, complex operation, limited scalability | [6,7] |
| Soxhlet extraction | Solvent continuously flows through plant material, dissolving oil components. | 0.8-6.71 | Various depending on solvent | Efficient extraction, good for large quantities | Solvent use raises environmental concerns, safety hazards, potential residue in extract | [8,9] |
| Vacuum fractional distillation | Spinning band column equipped high vacuum fractional distillation setup | 1.90-88 | Various depending on fractions of fractional distillation unit | Preserve heat sensitive compounds, reduce risk of contamination, controlled treatment possible | Complex and expensive, lower yield, time-consuming, unsuitable for all oil | [10,11] |

| **Table S2:** Antimicrobial activity of lemongrass (*Cymbopogon spp*.) essential oil against pathogenic bacteria and fungi as depicted by the zone of inhibition (ZOI) following disc/ well diffusion assay | | | | |
| --- | --- | --- | --- | --- |
| **Sl. No.** | **Plant name** | **Notes** | **Microorganism** | **Study** |
| 1. | *C. citratus* | Synergy with other essential oil components | Gram ‘+’ve and ‘-’ve bacteria and fungi | [1] |
| 2. | *C. distans* | p-menthenol has strong activity against pathogens | Gram ‘+’ve and ‘-’ve bacteria and fungi | [9] |
| 3. | *C. flexuosus* and *C. citratus* | *C. flexuosus* showed better activity than *C. citratus* may be due to higher citral content | Gram ‘+’ve and ‘-’ve bacteria | [12] |
| 4. | *C. nardus* | Geraniol in the essential oil inhibit biofilm | Gram ‘+’ve and ‘-’ve bacteria and antibiofilm activity against *Staphylococcus aureus* | [2] |
| 5. | *C. citronella* | Presence of aldehydes and acid esters responsible for the activity | *Escherichia coli* and *Aspergillus niger* | [13,14] |
| 6. | *C. khasianus* | Geraniol in the essential oil showed maximum activity compared to other components | Gram ‘+’ve and ‘-’ve bacteria and *Candida albicans* | [13-15] |
| 7. | *C. winterianus* | Variation in antimicrobial activity due to different extraction methods | Gram ‘+’ve and ‘-’ve bacteria and *Candida* sp. | [15-17] |
| 8. | *C. flexuosus* | Citral can inhibit dual-species biofilm formation | *Staphylococcus aureus* and  *Candida sp*. | [18,19] |
| 9. | *C. citratus* | Phytochemical agents responsible for high antibacterial activity | Gram ‘+’ve and ‘-’ve bacteria | [20-22] |
| 10. | *C. citratus* | Showed antiviral, anticancer, antistress activity | Gram ‘+’ve and ‘-’ve bacteria, fungi, and *Mycobacterium* | [13-16] |
| 11. | *C. citratus* | Presence of citral is responsible for antimicrobial activity | Gram ‘+’ve and ‘-’ve bacteria, filamentous fungi | [14-16] |
| 12. | *C. winterianus,*  *C. citratus,* and *C. martini* | High content of geranial-, neral-, geraniol-, and citronellal in LGEO of leaves responsible for better activity than root | Gram ‘+’ve and ‘-’ve bacteria and fungi | [7-9] |
| 13. | *C. flexuosus* | Activity against foodborne pathogens | Fungi | [7] |
| 14. | *C. flexuosus* | Remove biofilm of food-borne pathogens and spoilage bacteria | Gram ‘+’ve and ‘-’ve bacteria, filamentous fungi | [9] |
| 15. | *C. winterianus* | Inhibit pathogens causing severe disease of *Mentha arvensis* | *Fusarium oxysporum* and *Alternaria alternata* | [10] |

| **Supplementary figure:** Gas chromatography mass spectroscopy (GCMS) analysis of each component present in lemongrass (*Cymbopogon flexuous*) essential oil extracted using steam distillation and microwave assisted hydro distillation technique |
| --- |
| 1. **Linalyl formate** |
|  |
| 1. **-Pinene** |
|  |
| 1. **Camphene** |
|  |
| 1. **D-limonene** |
|  |
| 1. **Linalool** |
|  |
| 1. **Ethyl-linalool** |
|  |
| 1. **Isogeranial** |
|  |
| 1. **-citral (27.47%)** |
|  |
| 1. **-citral (72.53%)** |
|  |
| 1. **Geranylacetete** |
|  |
| 1. **Caryophyllene** |
|  |

**References**

1. Ali MM, Yusuf MA, Abdalaziz MN. GC-MS Analysis and Antimicrobial Screening of Essential Oil from Lemongrass (*Cymbopogon citratus*). Int J Pharm Chem 2017;3:72.
2. Pontes EKU, Melo HM, Nogueira JWA, et al. Antibiofilm activity of the essential oil of citronella (*Cymbopogon nardus*) and its major component, geraniol, on the bacterial biofilms of *Staphylococcus aureus*. Food Sci Biotechnol. 2018;28:633-639.
3. Sarah M, Ardiansyah D, Misran E, Madinah I. Extraction of citronella oil from lemongrass (*Cymbopogon winterianus*) by sequential ultrasonic and microwave-assisted hydro-distillation. Alex Engg J 2023;70:569-583.
4. Dhotre I, Sathe V. Optimizing lemongrass essential oil extraction using microwave technology: exploring the influence of sparger, tri-spiral condenser, and ultrasonication. Biomass Convers Biorefin Published online December 26, 2023.
5. Balti MA, Hadrich B, Kriaa K, Kechaou N. Lab-scale extraction of essential oils from Tunisian lemongrass (*Cymbopogon flexuosus*). Chem Engg Proc – Proc Intens 2018;124:164-173.
6. Dangol S, Poudel DK, Ojha PK, et al. Essential oil composition analysis of *Cymbopogon sp.* from Eastern Nepal by GC-MS and Chiral GC-MS, and antimicrobial activity of some major compounds. Molecules 2023;28:543
7. Wu H, Li J, Jia Y, et al. Essential oil extracted from *Cymbopogon citronella* leaves by supercritical cjarbon Dioxide: Antioxidant and Antimicrobial Activities. J Anal Methods Chem 2019;2019:8192439.
8. Jaradat N. Qualitative and quantitative comparison of aromatic oil components and antifungal effects of *Cymbopogon flexuosus* obtained with supercritical CO2, microwave–ultrasonic, steam distillation, and hydro distillation extraction techniques. Molecules 2023;28:6870-6870. a
9. Okpo SO, Otaraku IJ. Modelling of soxhlet extraction of lemongrass oil. Int J Chem Engg Res 2020;7:24-29. doi:https://doi.org/10.14445/23945370/ijcer-v7i2p103
10. Padalia RC, Verma RS, Chauhan A, et al. p-Menthenols chemotype of *Cymbopogon distans* from India: composition, antibacterial and antifungal activity of the essential oil against pathogens. J Essent Oil Res 2017;30:40-46.
11. Gonçalves MVS, Silva LE da, Amaral WAD, et al. Chemical composition and antibacterial activity of *Cymbopogon citratus* and *Cymbopogon flexuosus* essential oils. Ciência e Natura 2018;40:2.
12. Singh G, Katoch M. Antimicrobial activities and mechanism of action of *Cymbopogon khasianus* (Munro ex Hackel) Bor essential oil. BMC Complement Med Ther 2020;20:331.
13. Verma RS, Verma SK, Tandon S, Padalia RC, Darokar MP. Chemical composition and antimicrobial activity of Java citronella (*Cymbopogon winterianus* Jowitt ex Bor) essential oil extracted by different methods. J Essent Oil Res 2020;32:449-455.
14. Gao S, Liu G, Li J, et al. Antimicrobial Activity of Lemongrass Essential Oil (*Cymbopogon flexuosus*) and Its Active Component Citral Against Dual-Species Biofilms of *Staphylococcus aureus* and *Candida Species*. Front Cell Infect Microbiol 2020;10:603858.
15. Nur H, Zaibunnisa AH, M. S. Halimahton Zahrah, S. Norashikin. An experimental design approach for the extraction of lemongrass (*Cymbopogon citratus*) oleoresin using pressurized liquid extraction (PLE). Int Food Res J 2013;20:451-455.
16. Kumar K, Malhotra J, Kumar S, et al. Citral enrichment in Lemongrass (*Cymbopogon flexuosus*) oil using spinning band equipped high vacuum distillation column and sensory evaluation of fractions. Food Chem Adv 2023;2:100291.
17. Mukarram M, Choudhary S, Khan MA, et al. Lemongrass essential oil components with Antimicrobial and Anticancer Activities. Antioxidants 2021;11:20.
18. Maurya A, Yadav H, Sharma R, et al. Antifungal efficacy and phytochemical characterization of citronella (Cymbopogon *winterianus* Jowitt ex Bor) essential oil against fungal pathogens causing severe diseases in *Mentha arvensis* L.. J. Essent. Oil-Bear. Plants 2024:1-11.
19. Monteiro Marques J, Serrano S, Selmi H, Giesteira Cotovio P, Semedo-Lemsaddek T. Antimicrobial and antibiofilm potential of *Thymus vulgaris* and *Cymbopogon flexuosus* Essential oils against pure and mixed cultures off foodborne bacteria. Antibiotics 2023;12:565.
20. Am S, Sangwan Rb, Kumar A, et al. Phytochemical screening and antibacterial activity of lemongrass (*Cymbopogon citratus*) leaves essential oil. J Pharmacog Phytochem 2021;10:445-449.
21. Valková V, Ďúranová H, Galovičová L, et al. *Cymbopogon citratus* essential oil: Its application as an antimicrobial agent in food preservation. Agronomy 2022;12:155.
22. Do DN, Nguyen DP, Phung VD, et al. Fractionating of lemongrass (*Cymbopogon citratus*) essential oil by vacuum fractional distillation. Processes 2021;9:593.
